# Supplementary material
Source: publisher figshare collection journal article supplement (https://tandf.figshare.com/articles/dataset/_/4668484)
Supplement: Supplementary file 1 [file 1]

# Appendix 1

The test words in each language in the Scandleft project. In the appendix the words are ordered according to place of articulation. In elicitation the words are presented in random order.

| Consonant | Vowel | English       |                | Swedish         |                | Danish            |                             | Finnish      |    | Norwegian      |                |
|-----------|-------|---------------|----------------|-----------------|----------------|-------------------|-----------------------------|--------------|----|----------------|----------------|
|           |       | Word          | TC             | Word            | TC             | Word              | TC                          | Word         | TC | Word           | TC             |
| /p-/      | +high | <i>pea(s)</i> | p <sup>h</sup> | <i>pippi</i>    | p <sup>h</sup> | <i>piger</i>      | b <sub>o</sub> <sup>h</sup> | <i>puu</i>   | p  |                |                |
|           |       | <i>pooh</i>   | p <sup>h</sup> |                 |                | <i>puder</i>      | b <sub>o</sub> <sup>h</sup> | <i>pilli</i> | p  |                |                |
|           |       | <i>peep</i>   | p <sup>h</sup> |                 |                |                   |                             |              |    |                |                |
|           | -high |               |                | <i>potta*</i>   | p <sup>h</sup> | <i>pærer</i>      | b <sub>o</sub> <sup>h</sup> | <i>paivä</i> | p  | <i>pærer</i>   | p <sup>h</sup> |
|           |       |               |                | <i>pappa</i>    | p <sup>h</sup> |                   |                             | <i>pää</i>   | p  | <i>potter*</i> | p <sup>h</sup> |
|           |       |               |                |                 |                |                   |                             | <i>pallo</i> | p  | <i>pappa</i>   | p <sup>h</sup> |
| /b-/      | +high | <i>bee</i>    | b <sub>o</sub> | <i>bilar</i>    | b <sub>o</sub> | <i>biler</i>      | b <sub>o</sub>              |              |    | <i>biler</i>   | b <sub>o</sub> |
|           |       |               |                | <i>bulle/ar</i> | b <sub>o</sub> |                   |                             |              |    |                |                |
|           | -high | <i>ball</i>   | b <sub>o</sub> | <i>boll/ar</i>  | b <sub>o</sub> | <i>bord</i>       | b <sub>o</sub>              |              |    | <i>baller</i>  | b <sub>o</sub> |
|           |       | <i>baby</i>   | b <sub>o</sub> |                 |                | <i>bøger</i>      | b <sub>o</sub>              |              |    | <i>båter*</i>  | b <sub>o</sub> |
| /t-/      | +high | <i>two</i>    | t <sup>h</sup> | <i>tupp/ar*</i> | t <sup>h</sup> |                   |                             | <i>tuli</i>  | t  |                |                |
|           |       | <i>tea</i>    | t <sup>h</sup> |                 |                |                   |                             | <i>tuoli</i> | t  |                |                |
|           |       | <i>teeth</i>  | t <sup>h</sup> |                 |                |                   |                             | <i>tie</i>   | t  |                |                |
|           | -high |               |                | <i>TV</i>       | t <sup>h</sup> | <i>tag</i>        | d <sub>o</sub> <sup>s</sup> | <i>talvi</i> | t  | <i>TV</i>      | t <sup>h</sup> |
|           |       |               |                | <i>tavla/or</i> | t <sup>h</sup> | <i>tog</i>        | d <sub>o</sub> <sup>s</sup> | <i>talo</i>  | t  | <i>to</i>      | t <sup>h</sup> |
|           |       |               |                |                 |                | <i>to</i>         | d <sub>o</sub> <sup>s</sup> | <i>taulu</i> | t  | <i>tepper*</i> | t <sup>h</sup> |
| /d-/      | +high |               |                | <i>duva/or</i>  | d <sub>o</sub> | <i>dyt*</i>       | d <sub>o</sub>              |              |    | <i>dyr</i>     | d <sub>o</sub> |
|           |       |               |                |                 |                | <i>dyr</i>        | d <sub>o</sub>              |              |    |                |                |
|           | -high | <i>doll</i>   | d <sub>o</sub> | <i>dörr/ar</i>  | d <sub>o</sub> | <i>døre</i>       | d <sub>o</sub>              |              |    | <i>dører</i>   | d <sub>o</sub> |
|           |       | <i>door</i>   | d <sub>o</sub> | <i>död</i>      | d <sub>o</sub> |                   |                             |              |    | <i>doer</i>    | d <sub>o</sub> |
|           |       | <i>daddy</i>  | d <sub>o</sub> |                 |                |                   |                             |              |    |                |                |
| /k-/      | +high | <i>key</i>    | k <sup>h</sup> |                 |                |                   |                             | <i>kieli</i> | k  | <i>kuer</i>    | k <sup>h</sup> |
|           |       | <i>kick</i>   | k <sup>h</sup> |                 |                |                   |                             | <i>kivi</i>  | k  |                |                |
|           |       |               |                |                 |                |                   |                             | <i>kuu</i>   | k  |                |                |
|           | -high | <i>car</i>    | k <sup>h</sup> | <i>kakor</i>    | k <sup>h</sup> | <i>køer</i>       | g <sub>o</sub> <sup>h</sup> | <i>kala</i>  | k  | <i>kaker</i>   | k <sup>h</sup> |
|           |       |               |                | <i>kopp/ar*</i> | k <sup>h</sup> | <i>Kaj</i>        | g <sub>o</sub> <sup>h</sup> | <i>kello</i> | k  | <i>kopper*</i> | k <sup>h</sup> |
|           |       |               |                | <i>kall</i>     | k <sup>h</sup> | <i>kager</i>      | g <sub>o</sub> <sup>h</sup> | <i>kaula</i> | k  |                |                |
| /g-/      | +high | <i>geese*</i> | g <sub>o</sub> | <i>gul</i>      | g <sub>o</sub> | <i>gulerødder</i> | g <sub>o</sub>              |              |    | <i>gul</i>     | g <sub>o</sub> |
|           |       |               |                |                 |                | <i>gul</i>        | g <sub>o</sub>              |              |    | <i>gutter*</i> | g <sub>o</sub> |
|           | -high | <i>gate*</i>  | g <sub>o</sub> | <i>golv</i>     | g <sub>o</sub> | <i>gulv</i>       | g <sub>o</sub>              |              |    | <i>golv</i>    | g <sub>o</sub> |
|           |       | <i>girl</i>   | g <sub>o</sub> | <i>går</i>      | g <sub>o</sub> |                   |                             |              |    |                |                |
|           |       |               |                |                 |                |                   |                             |              |    |                |                |
| /f-/      | +high | <i>feet*</i>  | f              | <i>fil/ar</i>   | f              | <i>fire</i>       | f                           |              |    | <i>fire</i>    | f              |
|           |       |               |                |                 |                | <i>fugle</i>      | f                           |              |    | <i>fugler*</i> | f              |
|           | -high | <i>four</i>   | f              | <i>fötter*</i>  | f              | <i>fodbolde</i>   | f                           |              |    | <i>fötter*</i> | f              |

|             |       |              |   |               |                |                |   |                |   |                |   |
|-------------|-------|--------------|---|---------------|----------------|----------------|---|----------------|---|----------------|---|
|             |       | <i>five</i>  | f | <i>får</i>    | f              |                |   |                |   |                |   |
| <i>/v-/</i> | +high |              |   | <i>vit</i>    | v              | <i>hvid</i>    | ʋ | <i>vyö</i>     | v |                |   |
|             | -high | <i>Val</i>   | v | <i>vov</i>    | v              | <i>veje</i>    | ʋ | <i>vauva</i>   | v | <i>veier</i>   | v |
|             |       | <i>very</i>  | v | <i>va/lar</i> | v              | <i>hvaler</i>  | ʋ | <i>veli</i>    | v | <i>votter*</i> | v |
|             |       | <i>vase*</i> | v |               |                |                |   |                |   | <i>våt*</i>    | v |
| <i>/s-/</i> | +high |              |   | <i>ljus</i>   | ʃ <sub>ɪ</sub> | <i>is</i>      | s | <i>kaulus*</i> | s | <i>is</i>      | s |
|             |       |              |   | <i>hus</i>    | ʃ <sub>ɪ</sub> | <i>hus</i>     | s |                |   | <i>hus</i>     | s |
|             |       |              |   |               |                | <i>lys</i>     | s |                |   | <i>lys</i>     | s |
|             | -high | <i>bus*</i>  | s | <i>vas</i>    | ʃ <sub>ɪ</sub> |                |   | <i>ylös</i>    | s |                |   |
|             |       | <i>house</i> | s |               |                |                |   | <i>alas</i>    | s |                |   |
|             |       | <i>horse</i> | s |               |                |                |   |                |   |                |   |
| <i>/s-/</i> | +high | <i>sea</i>   | s | <i>sol/ar</i> | ʃ <sub>ɪ</sub> |                |   | <i>suu</i>     | s | <i>sol</i>     | s |
|             |       |              |   | <i>sil/ar</i> | ʃ <sub>ɪ</sub> |                |   | <i>syö</i>     | s | <i>siler</i>   | s |
|             |       |              |   |               |                |                |   | <i>siili</i>   | s |                |   |
|             | -high | <i>saw</i>   | s | <i>säl/ar</i> | ʃ <sub>ɪ</sub> | <i>sutte*</i>  | s |                |   | <i>seler</i>   | s |
|             |       | <i>Sue</i>   | s |               |                | <i>søløver</i> | s |                |   |                |   |
|             |       |              |   |               |                | <i>save</i>    | s |                |   |                |   |
| <i>/n-/</i> |       | <i>knee</i>  | n | <i>nalle</i>  | n              | <i>nøgler</i>  | n | <i>nappi</i>   | n | <i>natt</i>    | n |
|             |       | <i>nose</i>  | n | <i>nyckel</i> | n              | <i>næse</i>    | n | <i>nalle</i>   | n | <i>nøkket</i>  | n |
|             |       | <i>night</i> | n | <i>navel</i>  | n              | <i>negle</i>   | n | <i>naula</i>   | n | <i>navle</i>   | n |

TC = Test Consonant in narrow phonetic transcription. The voiced plosives are often produced partially devoiced (<sub>h</sub>).

\* words with pressure consonant with other place of articulation than target consonant

NB! the Danish /b d g/ in medial and final position are pronounced as approximants
